# Supplementary figures and images for: Specific inhibition of NF-Y subunits triggers different cell proliferation defects
Source: PubMed Central journal article supplement — Nucleic Acids Res. 2011 Mar 15;39(13):5356–68. doi: 10.1093/nar/gkr128 (PMC3141247; doi:10.1093/nar/gkr128), 2011-03-15

**A**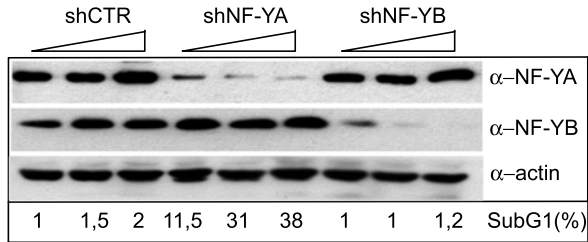**B**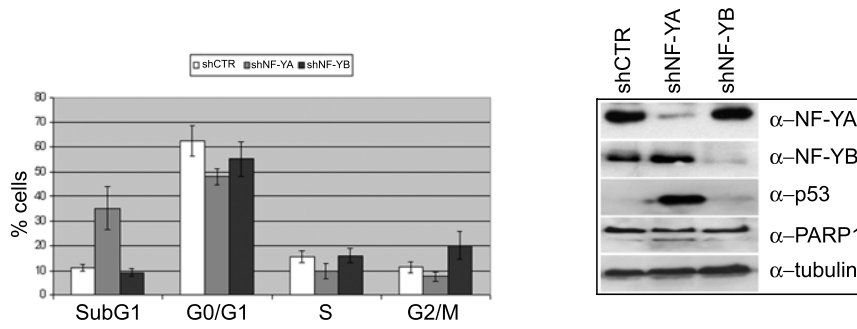**C**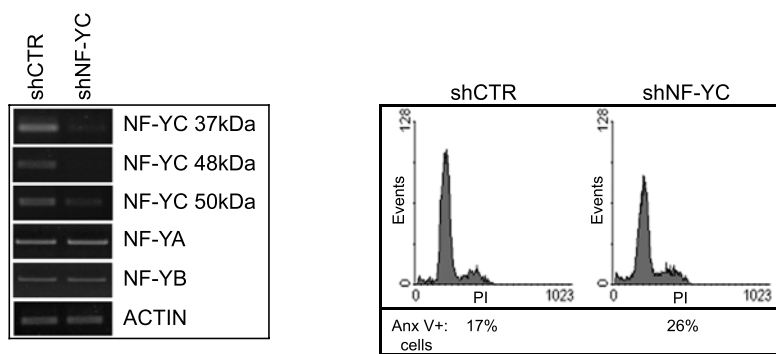

Supplement: supp_gkr128_Suppl_Fig_1.pdf [file supp_gkr128_Suppl_Fig_1.pdf]

**A**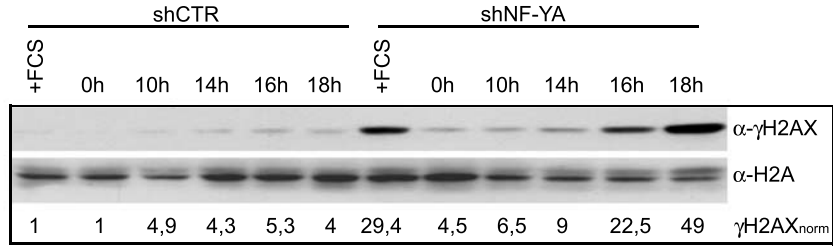**B**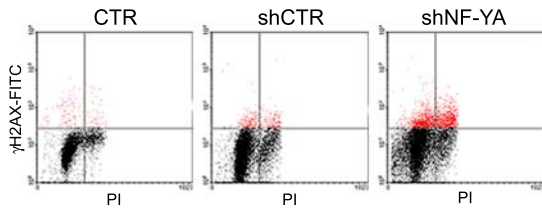**C**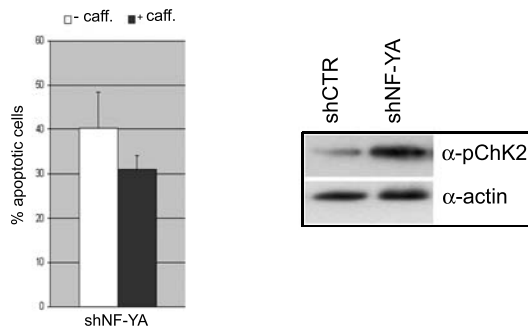

Supplement: supp_gkr128_Suppl_Fig_2.pdf [file supp_gkr128_Suppl_Fig_2.pdf]

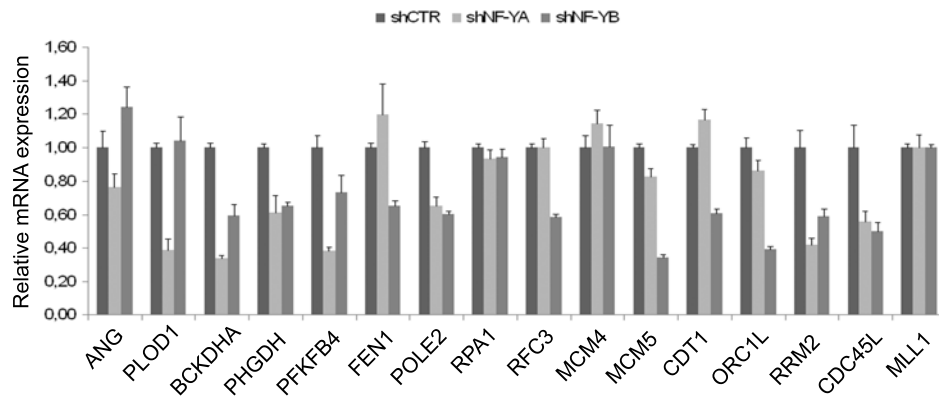

Supplement: supp_gkr128_Suppl_Fig_3.pdf [file supp_gkr128_Suppl_Fig_3.pdf]
